# Supplementary material for: Sodium-Glucose Cotransporter 2 Inhibitors and Management of Refractory Hypomagnesemia Without Overt Urinary Magnesium Wasting: A Report of 2 Cases
Source: PubMed Central journal article supplement — Kidney Med. 2022 Aug 12;4(10):100533. doi: 10.1016/j.xkme.2022.100533 (PMC9519375; doi:10.1016/j.xkme.2022.100533), 2022-08-12
Supplement: mmc1.pdf [file mmc1.pdf]

Table S1. Medications during 24-hour urine collections.

|             | <b>Case 1</b>                                                                                                                                                                                                                                                                                                                                                                                         | <b>Case 2</b>                                                                                                                                                                                                                                                                                                            |
|-------------|-------------------------------------------------------------------------------------------------------------------------------------------------------------------------------------------------------------------------------------------------------------------------------------------------------------------------------------------------------------------------------------------------------|--------------------------------------------------------------------------------------------------------------------------------------------------------------------------------------------------------------------------------------------------------------------------------------------------------------------------|
|             | Pre-Empagliflozin                                                                                                                                                                                                                                                                                                                                                                                     |                                                                                                                                                                                                                                                                                                                          |
| Medications | insulin glargine 100 units daily<br>insulin aspart 10 units with meals<br>semaglutide 1 mg once weekly<br>losartan 25 mg daily<br>atenolol 50 mg daily<br>spironolactone 25 mg daily<br>amlodipine-atorvastatin 5-40 mg daily<br>aspirin 81 mg daily<br>apixaban 5 mg twice daily<br>Intravenous MgSO <sub>4</sub> *                                                                                  | famotidine 20 mg BID<br>metformin SA 500 mg daily<br>cholecalciferol 25 mcg daily<br>insulin glargine 30U nightly<br>lisinopril 40 mg daily<br>glipizide 10 mg BID<br>tamsulosin 0.4 mg daily<br>rosuvastatin 40 mg daily<br>alogliptin 25 mg daily<br>magnesium EC tab 140 mg BID<br>magnesium oxide 400/800/400 mg TID |
|             | Post-empagliflozin                                                                                                                                                                                                                                                                                                                                                                                    |                                                                                                                                                                                                                                                                                                                          |
| Medications | aspirin 81 mg daily<br>amlodipine 5 mg daily<br>apixaban 5 mg BID<br>atorvastatin 40 mg daily<br>atenolol 50 mg daily<br>chelated magnesium 300 mg TID<br>empagliflozin 10 mg daily<br>gabapentin 300 mg TID<br>insulin aspart 13 units TID,<br>insulin glargine 100 units daily<br>losartan 25 mg daily<br>semaglutide 1 mg once weekly<br>spironolactone 25 mg daily<br>vitamin D3 2000 units daily | famotidine 20 mg BID<br>metformin SA 500 mg daily<br>cholecalciferol 25 mcg daily<br>insulin glargine 30U nightly<br>lisinopril 40 mg daily<br>glipizide 10 mg BID<br>tamsulosin 0.4 mg daily<br>rosuvastatin 40 mg daily<br>alogliptin 25 mg daily<br>empagliflozin 12.5 mg daily<br>magnesium oxide 400mg BID          |

\*Intravenous MgSO<sub>4</sub> 4 to 6 grams, varying from once a week to twice a month regimen, to avoid symptomatic hypomagnesemia.

Table S2. 24-hour urine study calculations of creatinine clearance, fractional excretion of magnesium (FEMg), and the filtered load of magnesium, pre-and-post-SGLT2 inhibitor use.

| <b>Case 1</b>             |        |                           |        |
|---------------------------|--------|---------------------------|--------|
| <b>Pre-Empagliflozin</b>  |        | <b>Post-empagliflozin</b> |        |
| uMg (mg/dl)               | 3.5    | uMg –mg/dl                | 5.12   |
| sMg (mg/dl)               | 1.3    | sMg (mg/dl)               | 2      |
| uCr (mg/dl)               | 67.18  | uCr (mg/dl)               | 43     |
| sCr (mg/dl)               | 0.8    | sCr (mg/dl)               | 0.98   |
| Cr Cl (ml/min)            | 93.31  | Cr Cl (ml/min)            | 76.18  |
| FEMg                      | 4.622% | FEMg                      | 8.378% |
| Filtered Mg load (mg/min) | 1.21   | Filtered Mg load (mg/min) | 1.52   |
| <b>Case 2</b>             |        |                           |        |
| <b>Pre-Empagliflozin</b>  |        | <b>Post-empagliflozin</b> |        |
| uMg (mg/dl)               | 4.32   | uMg –mg/dl                | 4.4    |
| sMg (mg/dl)               | 1.5    | sMg (mg/dl)               | 1.7    |
| uCr (mg/dl)               | 97.3   | uCr (mg/dl)               | 95     |
| sCr (mg/dl)               | 1.2    | sCr (mg/dl)               | 1.1    |
| Cr Cl (ml/min)            | 104.17 | Cr Cl (ml/min)            | 119.95 |
| FEMg                      | 5.058% | FEMg                      | 4.277% |
| Filtered Mg load (mg/min) | 1.56   | Filtered Mg load (mg/min) | 2.03   |

uMg and uCr represent urinary magnesium and creatinine concentrations measured in 24-hour urine collections, and sMg and sCr represent serum magnesium and creatinine levels, respectively. Cr Cl, creatinine clearance calculated using  $Cr\ Cl = [uCr \times V] / sCr$ . FEMg was calculated as  $100 \cdot (uMg \cdot sCr) / (0.7 \cdot sMg \cdot uCr)$ . Filtered Load = Glomerular Filtration Rate x Plasma Concentration. 24-hour urine study was performed 48 hours after the last dose of IV MgSO<sub>4</sub> during the pre-empagliflozin period in Case 1.
